# Supplementary material for: Does dose-dense neoadjuvant chemotherapy have clinically significant prognostic value in breast cancer?: A meta-analysis of 3,724 patients
Source: PubMed Central journal article supplement (PMC7259732; doi:10.1371/journal.pone.0234058), 2020-05-29
Supplement: pone.0234058.s001.pdf [file pone.0234058.s001.pdf]

Table 1. Characteristics of the studies included

| First author, year (reference) | Trial name      | Study location | Treatment protocol             | Treatment interval, days | Number of patients | Median follow-up, months | Median age (range) | Stage                                     |                                            | ER positive, %                | PR positive, % | pCR events (%) |
|--------------------------------|-----------------|----------------|--------------------------------|--------------------------|--------------------|--------------------------|--------------------|-------------------------------------------|--------------------------------------------|-------------------------------|----------------|----------------|
|                                |                 |                |                                |                          |                    |                          |                    | Tumor size, %                             | Nodal status, %                            |                               |                |                |
| Baldini E, 2003 (11)           | PisaGenoa       | Italy          | *CEF × 3 - surgery radiation - | 14                       | 77                 | 60                       | 52 (30–70)         | IIIA: 22.7, IIIB: 49.3, IBC: 24           |                                            | 43                            | 34             | 3 (4.1)        |
|                                |                 |                | CMF and CEF intercalated × 6   | 21                       | 73                 |                          |                    |                                           |                                            | 50 (30–70)                    | 38.4           | 26             |
| Therasse P, 2003 (15)          | EORTC-NCIC-SAKK | Europe         | *EC × 6                        | 14                       | 224                | 66                       | 49 (16–72)         | T0-2: 4, T3: 9, T4: 86                    | N0-1: 58, N2-3: 40                         | 42                            | NR             | 31 (14.0)      |
| von Minckwitz G, 2005 (13)     | GeparDuo        | Germany        | CEF × 6                        | 28                       | 224                | 60                       | 52 (24–77)         | T0-2: 4, T3: 9, T4: 86                    | N0-1: 54, N2-3: 44                         | 38                            | NR             | 22 (10.0)      |
|                                |                 |                | *A DOC × 4                     | 14                       | 455                |                          |                    | T1: 6; T2: 85.4; T3: 8.7                  | Positive 37.6                              | 65.3                          | 61.9           | 31 (7.0)       |
| Untch M, 2011 (2, 19)          | PREPARE         | Germany        | AC × 4 - DOC × 4               | 21                       | 458                | 62.4                     | 51 (24–74)         | T1: 8; T2: 84.4; T3: 7.7                  | Positive 49.9                              | 69.5                          | 55.1           | 63 (14.3)      |
|                                |                 |                | *ddE × 3 - ddP × 3 - CMF × 3   | 14                       | 363                |                          |                    | T1–3: 86.2, T4: 8.5                       | Positive 37.2                              | ER and/or PR positive 41.6    | 76 (20.9)      |                |
| Vriens BE, 2013 (14)           | BOOG            | Netherlands    | EC × 4 - P × 4                 | 21                       | 370                | NR                       | 49 (26–65)         | T1–3: 90.8, T4: 7.3                       | Positive 38.4                              | ER and/or PR positive 43      | 53 (14.3)      |                |
|                                |                 |                | *TAC × 6                       | 21                       | 101                |                          |                    | T1: 5, T2: 45, T3: 30, T4: 20             | Positive 74                                | ER and/or PR positive 65      | 16 (16.0)      |                |
| Miller KD, 1999 (12)           | Hoosier         | America        | AC × 3 - T × 3                 | 21                       | 100                | NR                       | 49 (27–70)         | T1: 2, T2: 49, T3: 34, T4: 15             | Positive 76                                | ER and/or PR positive 66      | 21 (21.0)      |                |
|                                |                 |                | *A × 3 - DOC × 3               | 14                       | 19                 |                          |                    | 47 (31–60)                                | stage II or noninflammatory stage III: 100 | NR                            | 3 (15.7)       |                |
| Untch M, 2009 (16)             | AGO-1           | Germany        | A DOC × 4                      | 21                       | 21                 | 54                       | 46 (28–63)         | T2: 55, T3: 27, T4: 18                    | Positive 54                                | Hormone receptor positive: 66 | 40 (12.0)      |                |
|                                |                 |                | *E × 3 - P × 3                 | 14                       | 333                |                          |                    | T2: 51, T3: 31, T4: 18                    | Positive 54                                | Hormone receptor positive: 69 | 20 (6.0)       |                |
| Arun BK, 2011 (18)             | Houston         | America        | EP × 4                         | 21                       | 335                | 91.5                     | NR                 | T0: 1, T1: 4, T2: 23, T3: 22, T4: 50      | Positive 88.2                              | 39.5                          | 39.5           | 13 (13.1)      |
|                                |                 |                | *FAC × 4                       | 18                       | 99                 |                          |                    | T0: 2, T1: 7.8, T2: 18.6, T3: 22.5, T4: 4 | Positive 90                                | 47.1                          | 55.3           | 9 (9.0)        |
| Ellis GK, 2011 (17)            | SWOG-0012       | America        | FAC × 4                        | 21                       | 100                | 60                       | NR                 | T0: 2, T1: 7.8, T2: 18.6, T3: 22.5, T4: 4 | Positive 90                                | 47.1                          | 55.3           | 9 (9.0)        |
|                                |                 |                | *wAC × 12-wP × 12              | 7                        | 186                |                          |                    | 52 (27–76)                                | IIB: 12, IIIA 31, IIIB 52                  | Hormone receptor positive: 55 | 43 (24.3)      |                |
|                                |                 |                | AC × 4 - wP × 12               | 21                       | 186                |                          | 51 (22–77)         | IIB: 19, IIIA 31, IIIB 48                 |                                            | Hormone receptor positive: 46 | 37 (20.7)      |                |

\* Dose-dense arm.

Abbreviations: A = doxorubicin; C = cyclophosphamide; DOC = docetaxel; E = epirubicin; ER = estrogen receptor; F = fluorouracil; M = methotrexate; NR = not reported; P = paclitaxel; pCR = pathological complete response; PR = progesterone
