# Supplementary material for: Does dose-dense neoadjuvant chemotherapy have clinically significant prognostic value in breast cancer?: A meta-analysis of 3,724 patients
Source: PubMed Central journal article supplement (PMC7259732; doi:10.1371/journal.pone.0234058), 2020-05-29
Supplement: pone.0234058.s002.pdf [file pone.0234058.s002.pdf]

Table 2. Trials chemotherapy protocols.

| <b>Study</b>               | <b>Conventional arm</b>                                                                                                                                                                                                                                                           | <b>Dose-dense arm</b>                                                                                                                                                                                                                                                             |
|----------------------------|-----------------------------------------------------------------------------------------------------------------------------------------------------------------------------------------------------------------------------------------------------------------------------------|-----------------------------------------------------------------------------------------------------------------------------------------------------------------------------------------------------------------------------------------------------------------------------------|
| Baldini E, 2003 (11)       | C: 600 mg/m <sup>2</sup> + E: 60 mg/m <sup>2</sup> + F: 600 mg/m <sup>2</sup> , every 3 weeks for 3 cycles then local therapy then CEF (same) intercalated by C: 600 mg/m <sup>2</sup> + M: 60 mg/m <sup>2</sup> + F: 600 mg/m <sup>2</sup> every 3 weeks for a total of 6 cycles | C: 600 mg/m <sup>2</sup> , E: 60 mg/m <sup>2</sup> , F: 600 mg/m <sup>2</sup> , every 2 weeks for 3 cycles then local therapy then CEF (same) intercalated by C: 600 mg/m <sup>2</sup> + M: 60 mg/m <sup>2</sup> + F: 600 mg/m <sup>2</sup> every 2 weeks for a total of 6 cycles |
| Therasse P, 2003 (15)      | C: 75 mg/m <sup>2</sup> (orally days 1 to 14) + E: 60 mg/m <sup>2</sup> (days 1 and 8) + F: 500 mg/m <sup>2</sup> (days 1 and 8), every 28 days for 6 cycles                                                                                                                      | E: 120 mg/m <sup>2</sup> + C: 830 mg/m <sup>2</sup> , every 14 days for 6 cycles                                                                                                                                                                                                  |
| von Minckwitz G, 2005 (13) | A: 60 mg/m <sup>2</sup> + C: 600 mg/m <sup>2</sup> 4 cycles , then DOC: 75 mg/m <sup>2</sup> , every 3 weeks for 4 cycles                                                                                                                                                         | A: 50 mg/m <sup>2</sup> + DOC: 75 mg/m <sup>2</sup> , every 2 weeks for 4 cycles                                                                                                                                                                                                  |
| Untch M, 2011 (2, 19)      | E: 90 mg/m <sup>2</sup> + C: 600 mg/m <sup>2</sup> every 3 weeks for four cycles then P: 175 mg/m <sup>2</sup> every 3 weeks for 4 cycles                                                                                                                                         | E: 150 mg/m <sup>2</sup> every 2 weeks for 3 cycles then P: 225 mg/m <sup>2</sup> every 2 weeks for 3 cycles then CMF (C: 500 mg/m <sup>2</sup> , M: 40 mg/m <sup>2</sup> , and F: 600 mg/m <sup>2</sup> ) , days 1 and 8, every 4 weeks for 3 cycles                             |
| Vriens BE, 2013 (14)       | A: 60 mg/m <sup>2</sup> + C: 600 mg/m <sup>2</sup> , every 3 weeks for 4 cycles then DOC: 100 mg/m <sup>2</sup> , every 3 weeks for 4 cycles                                                                                                                                      | A: 75 mg/m <sup>2</sup> + C: 500 mg/m <sup>2</sup> + DOC: 50 mg/m <sup>2</sup> , every 3 weeks for 6 cycles                                                                                                                                                                       |
| Miller KD, 1999 (12)       | A: 75mg/m <sup>2</sup> every 2 weeks for 3 cycles then DOC: 100 mg/m <sup>2</sup> every 2 weeks for 3 cycles                                                                                                                                                                      | A: 56 mg/m <sup>2</sup> + DOC: 75 mg/m <sup>2</sup> every 3 weeks for 4 cycles                                                                                                                                                                                                    |
| Untch M, 2009 (16)         | E: 90 mg/m <sup>2</sup> + P: 175 mg/m <sup>2</sup> every 3 weeks for 4 cycles                                                                                                                                                                                                     | E: 150 mg/m <sup>2</sup> , every 14 days for 3 cycles then P: 250 mg/m <sup>2</sup> , every 14 days for 3 cycles                                                                                                                                                                  |
| Arun BK, 2011 (18)         | F: 500 mg/m <sup>2</sup> + A: 50 mg/m <sup>2</sup> + C: 500 mg/m <sup>2</sup> , every 21 days for 4 cycles                                                                                                                                                                        | F: 600 mg/m <sup>2</sup> + A: 60 mg/m <sup>2</sup> + C: 1000 mg/m <sup>2</sup> , every 18 days for 4 cycles                                                                                                                                                                       |
| Ellis GK, 2011 (17)        | A: 60 mg/m <sup>2</sup> + C: 600 mg/m <sup>2</sup> , every 3 weeks for 5 cycles, then local therapy, then P: 80 mg/m <sup>2</sup> /wk for 12 weeks                                                                                                                                | A: 24 mg/m <sup>2</sup> /wk, every week for 15 weeks + C: 60 mg/m <sup>2</sup> /d, orally each day for 15 weeks, then local therapy, then P: 80 mg/m <sup>2</sup> /wk for 12 weeks                                                                                                |

Abbreviations: A = doxorubicin; C = cyclophosphamide; DOC = docetaxel; E = epirubicin; F = fluorouracil; M = methotrexate; P = paclitaxel.
