# Supplementary material for: Does dose-dense neoadjuvant chemotherapy have clinically significant prognostic value in breast cancer?: A meta-analysis of 3,724 patients
Source: PubMed Central journal article supplement (PMC7259732; doi:10.1371/journal.pone.0234058), 2020-05-29
Supplement: pone.0234058.s004.pdf [file pone.0234058.s004.pdf]

## PubMed MEDLINE

| Search | Query                                                                                                                                                                                                                                                                                                                                                                                                                                                                                                                                                            | Items found            | Time     |
|--------|------------------------------------------------------------------------------------------------------------------------------------------------------------------------------------------------------------------------------------------------------------------------------------------------------------------------------------------------------------------------------------------------------------------------------------------------------------------------------------------------------------------------------------------------------------------|------------------------|----------|
| #1     | Search " <b>Breast Neoplasms</b> "[Mesh] Sort by: <b>Best Match</b>                                                                                                                                                                                                                                                                                                                                                                                                                                                                                              | <a href="#">288560</a> | 22:52:08 |
| #2     | Search ((((((((((Breast Neoplasm[Title/Abstract]) OR Breast Tumor[Title/Abstract]) OR Breast Cancer[Title/Abstract]) OR Mammary Cancer[Title/Abstract]) OR Malignant Neoplasm of Breast[Title/Abstract]) OR Breast Malignant Neoplasm[Title/Abstract]) OR Malignant Tumor of Breast[Title/Abstract]) OR Breast Malignant Tumor[Title/Abstract]) OR Breast Malignant Tumors[Title/Abstract]) OR Cancer of Breast[Title/Abstract]) OR Cancer of the Breast[Title/Abstract]) OR Breast Carcinoma[Title/Abstract] Sort by: Best Match                                | <a href="#">288418</a> | 22:54:35 |
| #3     | Search ((((((((((Breast Neoplasm[Title/Abstract]) OR Breast Tumor[Title/Abstract]) OR Breast Cancer[Title/Abstract]) OR Mammary Cancer[Title/Abstract]) OR Malignant Neoplasm of Breast[Title/Abstract]) OR Breast Malignant Neoplasm[Title/Abstract]) OR Malignant Tumor of Breast[Title/Abstract]) OR Breast Malignant Tumor[Title/Abstract]) OR Breast Malignant Tumors[Title/Abstract]) OR Cancer of Breast[Title/Abstract]) OR Cancer of the Breast[Title/Abstract]) OR Breast Carcinoma[Title/Abstract])) AND "Breast Neoplasms"[Mesh] Sort by: Best Match | <a href="#">206186</a> | 22:55:16 |
| #4     | Search "Neoadjuvant Therapy"[Mesh] Sort by: Best Match                                                                                                                                                                                                                                                                                                                                                                                                                                                                                                           | <a href="#">20055</a>  | 22:56:51 |
| #5     | Search ((Neoadjuvant Therapies[Title/Abstract]) OR Neoadjuvant Treatment[Title/Abstract]) OR Neoadjuvant Treatments[Title/Abstract]                                                                                                                                                                                                                                                                                                                                                                                                                              | <a href="#">3682</a>   | 22:58:45 |
| #6     | Search (((Neoadjuvant Therapies[Title/Abstract]) OR Neoadjuvant Treatment[Title/Abstract]) OR Neoadjuvant Treatments[Title/Abstract])) OR "Neoadjuvant Therapy"[Mesh] Sort by: Best Match                                                                                                                                                                                                                                                                                                                                                                        | <a href="#">22134</a>  | 22:59:03 |
| #7     | Search chemotherapy[Title/Abstract]                                                                                                                                                                                                                                                                                                                                                                                                                                                                                                                              | <a href="#">359045</a> | 23:01:11 |
| #8     | Search ((((((Neoadjuvant Therapies[Title/Abstract]) OR Neoadjuvant Treatment[Title/Abstract]) OR Neoadjuvant                                                                                                                                                                                                                                                                                                                                                                                                                                                     | <a href="#">12262</a>  | 23:01:31 |

|                     |                                                                                                                                                                                                                                                                                                                                                                                                                                                                                                                                                                                                                                                                                                                                                                                                                                                                          |                       |          |
|---------------------|--------------------------------------------------------------------------------------------------------------------------------------------------------------------------------------------------------------------------------------------------------------------------------------------------------------------------------------------------------------------------------------------------------------------------------------------------------------------------------------------------------------------------------------------------------------------------------------------------------------------------------------------------------------------------------------------------------------------------------------------------------------------------------------------------------------------------------------------------------------------------|-----------------------|----------|
|                     | Treatments[Title/Abstract])) OR "Neoadjuvant Therapy"[Mesh])) AND chemotherapy[Title/Abstract] Sort by: Best Match                                                                                                                                                                                                                                                                                                                                                                                                                                                                                                                                                                                                                                                                                                                                                       |                       |          |
| <a href="#">#9</a>  | Search (dose) AND dense Sort by: Best Match                                                                                                                                                                                                                                                                                                                                                                                                                                                                                                                                                                                                                                                                                                                                                                                                                              | <a href="#">3190</a>  | 23:02:27 |
| <a href="#">#10</a> | Search (dose) AND intense                                                                                                                                                                                                                                                                                                                                                                                                                                                                                                                                                                                                                                                                                                                                                                                                                                                | <a href="#">5323</a>  | 23:02:52 |
| <a href="#">#11</a> | Search (every) AND 14                                                                                                                                                                                                                                                                                                                                                                                                                                                                                                                                                                                                                                                                                                                                                                                                                                                    | <a href="#">40944</a> | 23:03:07 |
| <a href="#">#12</a> | Search ((every) AND 14) AND days                                                                                                                                                                                                                                                                                                                                                                                                                                                                                                                                                                                                                                                                                                                                                                                                                                         | <a href="#">13535</a> | 23:03:30 |
| <a href="#">#13</a> | Search (every) AND week                                                                                                                                                                                                                                                                                                                                                                                                                                                                                                                                                                                                                                                                                                                                                                                                                                                  | <a href="#">24788</a> | 23:03:55 |
| <a href="#">#14</a> | Search (((((dose) AND dense)) OR ((dose) AND intense)) OR (((every) AND 14) AND days)) OR ((every) AND week)                                                                                                                                                                                                                                                                                                                                                                                                                                                                                                                                                                                                                                                                                                                                                             | <a href="#">44796</a> | 23:04:26 |
| <a href="#">#15</a> | Search (((((((dose) AND dense)) OR ((dose) AND intense)) OR (((every) AND 14) AND days)) OR ((every) AND week))) AND (((((((Neoadjuvant Therapies[Title/Abstract]) OR Neoadjuvant Treatment[Title/Abstract]) OR Neoadjuvant Treatments[Title/Abstract])) OR "Neoadjuvant Therapy"[Mesh])) AND chemotherapy[Title/Abstract])) AND (((((((((((Breast Neoplasm[Title/Abstract]) OR Breast Tumor[Title/Abstract]) OR Breast Cancer[Title/Abstract]) OR Mammary Cancer[Title/Abstract]) OR Malignant Neoplasm of Breast[Title/Abstract]) OR Breast Malignant Neoplasm[Title/Abstract]) OR Malignant Tumor of Breast[Title/Abstract]) OR Breast Malignant Tumor[Title/Abstract]) OR Breast Malignant Tumors[Title/Abstract]) OR Cancer of Breast[Title/Abstract]) OR Cancer of the Breast[Title/Abstract]) OR Breast Carcinoma[Title/Abstract])) AND "Breast Neoplasms"[Mesh]) | <a href="#">111</a>   | 23:05:49 |
